# Supplementary material for: Explaining Bacterial Dispersion on Leaf Surfaces with an Individual-Based Model (PHYLLOSIM)
Source: PLoS One. 2013 Oct 4;8(10):e75633. doi: 10.1371/journal.pone.0075633 (PMC3790818; doi:10.1371/journal.pone.0075633)
Supplement: Table S2 — Raw data related to Figure 5*. (XLSX) [file pone.0075633.s002.xlsx]

## Sheet: Table S2
Table S2: Raw data related to Figure 5*
	Fit F			Standard deviation
Days	2	8		2	8
Waterfilm, no detachment	0.0199658	0.00547162		0.00627464	0.00169521
Drops same volume, no detachment	0.0204411	0.00547162		0.00672283	0.00192489
Drops different volume, no detachment	0.0489637	0.0156799		0.0135591	0.00485117
Waterfilm, detachment 2.5%	0.801926	0.747828		0.0344425	0.0111062
Drops same volume, detachment 2.5%	0.772747	0.760013		0.00859946	0.0031765
Drops different volume, detachment 2.5%	0.784662	0.744808		0.0280495	0.0149301
Waterfilm, detachment 5%	0.837009	0.741159		0.0367289	0.0066171
Drops same volume, detachment 5%	0.791457	0.771804		0.0174722	0.0173377
Drops different volume, detachment 5%	0.733274	0.724119		0.0263436	0.0180639
Waterfilm, detachment 10%	0.778454	0.746416		0.00703995	0.00230152
Drops same volume, detachment 10%	0.780744	0.744816		0.0263254	0.0158256
Drops different volume, detachment 10%	0.792624	0.752446		0.026595	0.00565155
*Fit of the frequency distribution of colony size predicted by PHYLLOSIM with those observed by Monier and Lindow [4] calculated according to equation (1). Fit (F) ranges from 0 (no fit) to 1 (perfect fit).
Supporting information belonging to the publication Explaining bacterial dispersion on leaf surfaces with an individual-based model (PHYLLOSIM)
Annemieke van der Wal, Robin Tecon, Jan-Ulrich Kreft, Wolf M. Mooij, Johan H.J. Leveau
PLoS ONE, 2013
