# Supplementary material for: Explaining Bacterial Dispersion on Leaf Surfaces with an Individual-Based Model (PHYLLOSIM)
Source: PLoS One. 2013 Oct 4;8(10):e75633. doi: 10.1371/journal.pone.0075633 (PMC3790818; doi:10.1371/journal.pone.0075633)
Supplement: Table S3 — Different initial concentrations of sugars in the water (Csink) were set to test their effect on number of bacteria per size class*. (XLSX) [file pone.0075633.s003.xlsx]

## Sheet: Table S3
Table S3: Different initial concentrations of sugars in the water (Csink) were set to test their effect on number of bacteria per size class*
waterfilm, detachment 10%											Drops same volume, detachment 10%											Drops different volume, detachment 10%
0 days			2 days			8 days			16 days		0 days			2 days			8 days			16 days		0 days			2 days			8 days			16 days
size	number		size	number		size	number		size	number	size	number		size	number		size	number		size	number	size	number		size	number		size	number		size	number
1	9.33333		1	156.667		1	481.333		1	962.333	1	7		1	90.6667		1	283		1	521.667	1	8		1	91		1	298.667		1	559.667
2	1.33333		2	67.3333		2	228.667		2	415	2	0.333333		2	38		2	127.667		2	244	2	1.33333		2	49.3333		2	134.333		2	259
4			4	36		4	107		4	219	4			4	19.6667		4	66.3333		4	121.667	4			4	18.3333		4	67		4	125.667
8			8	18.6667		8	59.6667		8	103	8			8	13.6667		8	32		8	58.3333	8			8	11.6667		8	37.6667		8	63
16			16	11.3333		16	28		16	59.3333	16			16	5.66667		16	15.6667		16	31.6667	16			16	3.33333		16	16.3333		16	35.3333
32			32	5		32	14.3333		32	26	32			32	4.33333		32	11.3333		32	15	32			32	2		32	8.33333		32	15.3333
64			64	3		64	9		64	14	64			64	1.66667		64	5.33333		64	9.66667	64			64	2		64	2		64	7.33333
128			128	3		128	4		128	9	128			128	4.33333		128	3.33333		128	5.33333	128			128	4		128	3.33333		128	1.66667
256			256	6.33333		256	3		256	4.66667	256			256	3.33333		256	3		256	3	256			256	3.66667		256	1.66667		256	3.33333
512			512	1.33333		512	4		512	2.33333	512			512			512	4.66667		512	3.66667	512			512	0.333333		512	5		512	1.66667
1024			1024			1024	5.33333		1024	4.33333	1024			1024			1024	1.66667		1024	4.66667	1024			1024			1024	1.66667		1024	5
2048			2048			2048	0.333333		2048	4.66667	2048			2048			2048			2048	1	2048			2048			2048	0.333333		2048	1.33333
4096			4096			4096			4096	0.333333	4096			4096			4096			4096		4096			4096			4096			4096	0.333333
*Sugar diffused to the leaf cuticle for 24h without bacteria. Bacteria were then inoculated on the leaf.
Bacterial clustering patterns are averaged over 3 replicate simulations
Supporting information belonging to the publication Explaining bacterial dispersion on leaf surfaces with an individual-based model (PHYLLOSIM)
Annemieke van der Wal, Robin Tecon, Jan-Ulrich Kreft, Wolf M. Mooij, Johan H.J. Leveau
PLoS ONE, 2013
