# Supplementary material for: Explaining Bacterial Dispersion on Leaf Surfaces with an Individual-Based Model (PHYLLOSIM)
Source: PLoS One. 2013 Oct 4;8(10):e75633. doi: 10.1371/journal.pone.0075633 (PMC3790818; doi:10.1371/journal.pone.0075633)
Supplement: Table S4 — Fit of the frequency distribution of colony size predicted by PHYLLOSIM with those observed by Monier and Lindow (2004) calculated according to equation (1)*. (XLSX) [file pone.0075633.s004.xlsx]

## Sheet: Table S4
Table S4: Fit of the frequency distribution of colony size predicted by PHYLLOSIM with those observed by Monier and Lindow (2004) calculated according to equation (1)*.
				Fit F			Standard deviation
				Days			Days
Scenario description	Parameter at T=0	Value		2	8		2	8
Waterfilm, detachment 10%	Csink (g m-3)	3.909		0.814623	0.753288		0.00916593	0.012841
Drops same volume, detachment 10%	Csink (g m-3) of each water drop	2.926		0.828421	0.758176		0.0195935	0.00503249
Drops different volume, detachment 10%	Csink (g m-3) water drop 1	5.718		0.773223	0.752011		0.0182506	0.00346418
	Csink (g m-3) water drop 2	4.191
	Csink (g m-3) water drop 3	3.022
	Csink (g m-3) water drop 4	2.153
*Fit (F) ranges from 0 (no fit) to 1 (perfect fit).
Different initial concentrations of sugars in the water (Csink) were set to test their effect on number of bacteria per size class.
Supporting information belonging to the publication Explaining bacterial dispersion on leaf surfaces with an individual-based model (PHYLLOSIM)
Annemieke van der Wal, Robin Tecon, Jan-Ulrich Kreft, Wolf M. Mooij, Johan H.J. Leveau
PLoS ONE, 2013
