# Supplementary material for: Explaining Bacterial Dispersion on Leaf Surfaces with an Individual-Based Model (PHYLLOSIM)
Source: PLoS One. 2013 Oct 4;8(10):e75633. doi: 10.1371/journal.pone.0075633 (PMC3790818; doi:10.1371/journal.pone.0075633)
Supplement: Table S5 — Raw data related to Figure 5*. (XLSX) [file pone.0075633.s005.xlsx]

## Sheet: Table S5
Table S5: Raw data related to Figure 5*
non inoc		0 days		2 days		8 days		0days-noninoc
size	number	size	number	size	number	size	number	size	number
1_2	1600	1_2	3900	1_2	6000	1_2	6300	1_2	2300
4	400	4	1600	4	2200	4	2200	4	1200
8	300	8	900	8	1200	8	1800	8	600
16	150	16	400	16	600	16	1000	16	250
32	100	32	100	32	300	32	500	32
64	50	64	40	64	150	64	250	64
128	25	128	20	128	50	128	125	128
256		256	10	256	10	256	50	256	10
512		512		512	5	512	10	512
1024		1024		1024	2	1024	5	1024
2048		2048		2048	1	2048	2	2048
4096		4096		4096		4096	1	4096
8192		8192		8192		8192	1	8192
16384		16384		16384		16384	1	16384
*Bacterial cluster sizes on bean leaves, as reported by Monier and Lindow [4], Figure 1. Shown is the frequency distribution of bacterial cluster sizes on leaf surfaces before inoculation (‘non inoc’) and 0, 2, and 8 days after inoculation with the bacterium P. syringae pv. syringae strain B728a.
Data for each time point are an aggregate of measurements from three leaves and were normalized per square millimeter. Also shown is the distribution of cluster sizes of inoculated P. syringae cells (‘0 days – non inoc’) which was calculated by subtracting ‘non inoc’ cluster sizes from cluster sizes observed after inoculation with P. syringae (‘0 days’).
Supporting information belonging to the publication Explaining bacterial dispersion on leaf surfaces with an individual-based model (PHYLLOSIM)
Annemieke van der Wal, Robin Tecon, Jan-Ulrich Kreft, Wolf M. Mooij, Johan H.J. Leveau
PLoS ONE, 2013
