# Supplementary material for: Explaining Bacterial Dispersion on Leaf Surfaces with an Individual-Based Model (PHYLLOSIM)
Source: PLoS One. 2013 Oct 4;8(10):e75633. doi: 10.1371/journal.pone.0075633 (PMC3790818; doi:10.1371/journal.pone.0075633)
Supplement: Table S6 — Raw data related to Figure 3*. (XLSX) [file pone.0075633.s006.xlsx]

## Sheet: Table S6
Table S6: Raw data related to Figure 3*
A) Waterfilm, no detachment											B) Drops same volume, no detachment											C) Drops different volume, no detachment
0 days			2 days			8 days			16 days		0 days			2 days			8 days			16 days		0 days			2 days			8 days			16 days
size	number		size	number		size	number		size	number	size	number		size	number		size	number		size	number	size	number		size	number		size	number		size	number
1	11		1			1			1		1	9		1			1			1		1	7.33333		1			1			1
2	1.33333		2			2			2		2	0.666667		2			2			2		2	2		2			2			2
4			4			4			4		4			4			4			4		4			4			4			4
8			8			8			8		8			8			8			8		8			8			8			8
16			16			16			16		16			16			16			16		16			16			16			16
32			32			32			32		32			32			32			32		32			32	1.66667		32			32
64			64	1.66667		64			64		64			64	0.666667		64			64		64			64	3		64			64
128			128	6.66667		128			128		128			128	6.33333		128			128		128			128	2.33333		128	1.66667		128
256			256	4		256	1.66667		256		256			256	1.66667		256	0.666667		256		256			256	2		256	3		256	1.66667
512			512			512	6.66667		512	1.66667	512			512	1		512	6.33333		512	0.666667	512			512	0.333333		512	2.33333		512	3
1024			1024			1024	3.66667		1024	6.66667	1024			1024			1024	1.66667		1024	6.33333	1024			1024			1024	2		1024	2.33333
2048			2048			2048	0.333333		2048	3.66667	2048			2048			2048	1		2048	1.66667	2048			2048			2048	0.333333		2048	2
4096			4096			4096			4096	0.333333	4096			4096			4096			4096	1	4096			4096			4096			4096	0.333333
*Effect of water distribution on bacterial clustering patterns without detachment, averaged over 3 replicate simulations: A) landscape covered by a water film, B) landscape covered by the same amount of water but in drops of the same volume, C) landscape covered by the same amount of water but in drops of different volumes.
Supporting information belonging to the publication Explaining bacterial dispersion on leaf surfaces with an individual-based model (PHYLLOSIM)
Annemieke van der Wal, Robin Tecon, Jan-Ulrich Kreft, Wolf M. Mooij, Johan H.J. Leveau
PLoS ONE, 2013
